# 1 ConnectedReads: machine-learning optimized long-range 2 genome analysis workflow for next-generation sequencing

3 Chung-Tsai Su<sup>1,\*</sup>, Sid Weng<sup>1</sup>, Yun-Lung Li<sup>1</sup>, and Ming-Tai Chang<sup>1</sup>

4 <sup>1</sup>. ATGENOMIX INC.

5 \*Corresponding author: chungtsai.su@atgenomix.com

## 6 Abstract

7 Current human genome sequencing assays in both clinical and research settings  
8 primarily utilize short-read sequencing and apply resequencing pipelines to  
9 detect genetic variants. However, structural variant (SV) discovery remains a  
10 considerable challenge due to an incomplete reference genome, mapping errors  
11 and high sequence divergence. To overcome this challenge, we propose an  
12 efficient and effective whole-read assembly workflow with unsupervised graph  
13 mining algorithms on an Apache Spark large-scale data processing platform  
14 called ConnectedReads. By fully utilizing short-read data information,  
15 ConnectedReads is able to generate haplotype-resolved contigs and then  
16 streamline downstream pipelines to provide higher-resolution SV discovery  
17 than that provided by other methods, especially in N-gap regions. Furthermore,  
18 we demonstrate a cost-effective approach by leveraging ConnectedReads to  
19 investigate all spectra of genetic changes in population-scale studies.

20

## 21 Background

22 Whole-genome sequencing (WGS) is increasingly used in biomedical research,  
23 clinical, and personalized medicine applications to identify disease- and drug-  
24 associated genetic variants in humans, all with the goal of advancing precision  
25 medicine [1]. At present, next-generation sequencing (NGS, also called short-  
26 read sequencing (SRS)) is a well-established technology used to generate  
27 whole-genome data due to its high throughput and low cost [2]. Resequencing,  
28 especially of human samples, is one of the popular applications of NGS. This  
29 process maps raw reads against a reference genome and determines all kinds of

1 genomic variations, including single nucleotide polymorphisms (SNPs) and  
2 indels as well as genetic rearrangements and copy-number variants (CNVs) [3].  
3 However, a fundamental flaw in the resequencing pipeline is that it ignores the  
4 correlation between sequence reads; thus, resequencing does not fully and  
5 properly utilize sequence data and may generate inconsistent alignments,  
6 which make variant calling, especially structural variant (SV) calling, more  
7 complicated [4, 5]. Since the human reference genome is incomplete and  
8 contains many low-complexity regions, assembling sequence reads without  
9 reference bias would be a proper way to overcome the above challenges.  
10 Nonetheless, assembly-based approaches for WGS data suffer from several  
11 computational challenges, such as high computing resource requirements and  
12 long turnaround times.

13 In this article, we propose an efficient whole-read assembly workflow with  
14 unsupervised graph mining algorithms on an Apache Spark large-scale big data  
15 processing platform called ConnectedReads. By leveraging the in-memory  
16 cluster computing framework of Apache Spark [6], ConnectedReads takes less  
17 than 20 hours to assemble 30-fold human WGS data and generates  
18 corresponding long haplotype-resolved contigs for downstream analysis, such  
19 as read mapping, variant calling or phasing. To evaluate the performance of  
20 ConnectedReads, we use 68 high-confidence insertions in the NA12878 sample  
21 detected by svclassify as SV benchmarks [7]. To demonstrate the ability of  
22 ConnectedReads, three samples from different populations are used. Through  
23 ConnectedReads, we are able to investigate unique non-reference insertions  
24 (UNIs) and non-repetitive, non-reference (NRNR) sequences from population  
25 datasets [8, 9]. Furthermore, ConnectedReads provides high resolution for SVs,  
26 especially on insertions. In conclusion, ConnectedReads optimizes NGS reads  
27 to generate long haplotype-resolved contigs, not only reducing mapping error  
28 but also streamlining SV detection.

29

# 1 Results

## 2 Data preparation

3 To assess the utility of ConnectedReads, three WGS datasets from three  
4 different ethnic groups were selected from publicly available databases, as  
5 listed in Table 1, including NA12878 of European ancestry, NA24694 of Asian  
6 ancestry, and NA19240 of African ancestry. In addition, the samples were  
7 sequenced by three different Illumina platforms, namely, the NovaSeq 6000  
8 (NA12878), HiSeq 2500 (NA24694), and HiSeq X Ten (NA19240) platforms.  
9 Therefore, we believe that these datasets are representative of the majority of  
10 read-world data.

11

12 **Table 1.** Description of WGS datasets

| Sample  | Platform     | Coverage | Description                                | Source |
|---------|--------------|----------|--------------------------------------------|--------|
| NA12878 | NovaSeq 6000 | 30X      | HG001 (Population: CEU)                    | *a     |
| NA24694 | HiSeq 2500   | 30X      | HG006, Father of The Han Chinese GIAB Trio | *b     |
| NA19240 | HiSeq X Ten  | 35X      | Yoruba (Nigeria) (Population: YRI)         | *c     |

13 Data sources:

14 \*a <https://www.ebi.ac.uk/ena/data/view/ERR2438055>

15 \*b <https://www.ncbi.nlm.nih.gov/sra/SRX1388455>

16 \*c <https://www.ncbi.nlm.nih.gov/sra/SRX4637790>

17

## 18 Evaluations

19 The results for the datasets in Table 1 obtained by applying the ConnectedReads  
20 workflow with default settings are listed in Table 2. ConnectedReads is clearly  
21 able to reduce the number of contigs and total base pairs by more than 96% and  
22 87%, respectively. Since ConnectedReads generates haplotype-resolved contigs  
23 based on paired-end information, any two contigs would not be assembled  
24 together without sufficient support for paired-end information or overlaps.  
25 Although ConnectedReads aims to construct more accurate haplotype-aware  
26 contigs rather than longer ones, it is usually able to construct several contigs of  
27 more than 30 Kbps. In addition, there are 1,402,511, 1,224,389 and 2,082,886

1 contigs of  $\geq 1$  Kbps for NA12878, NA24694 and NA19240, respectively.  
2 Furthermore, the length of contigs is strongly correlated with coverage and read  
3 length. The deeper the coverage is, the longer the contigs that can be generated  
4 are.

5  
6  
7

8 **Table 2.** Description of the contigs of three datasets generated by  
9 ConnectedReads.

| Sample                         | NA12878        | NA24694       | NA19240        |
|--------------------------------|----------------|---------------|----------------|
| Number of contigs              | 16,348,524     | 18,900,370    | 18,261,647     |
| Total base pairs (bps)         | 10,466,069,046 | 9,925,886,082 | 14,093,570,587 |
| Average length                 | 640            | 525           | 772            |
| Longest contig                 | 37,619         | 33,904        | 32,145         |
| # of singletons ( $\leq 151$ ) | 8,351,671      | 11,305,117    | 8,355,394      |
| $\geq 1$ Kbps                  | 2,899,483      | 2,470,630     | 4,487,568      |
| $\geq 2$ Kbps                  | 1,402,551      | 1,224,389     | 2,082,886      |
| $\geq 5$ Kbps                  | 263,878        | 256,178       | 277,357        |

10  
11  
12  
13  
14  
15

ConnectedReads offers two advantages for downstream analysis. One is mapping recovery, and the other is SV detectability. Both of these advantages are described comprehensively by the following experimental results and case studies.

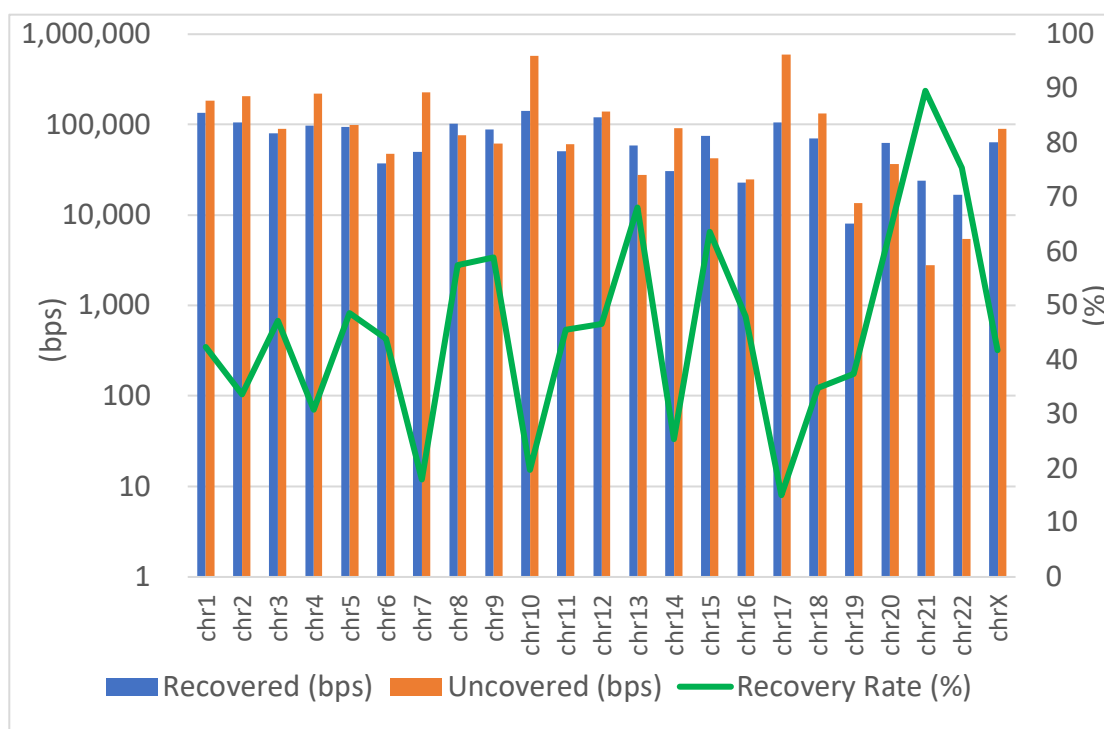

**Fig. 1.** Mapping recovery of NA12878 (short reads vs. ConnectedReads).

BWA and minimap2 are adopted for the short-read data and ConnectedReads contigs, respectively. Recovery Rate = # recovered / (# recovered + # uncovered).

First, mapping recovery is the best way to evaluate the advantage of ConnectedReads. According to the evolution of NGS technology in recent years, longer reads can reduce two kinds of mapping errors, namely, false mapping and uncovered regions based on the reference genome [10]. However, it is hard to determine whether a mapping record is false because of several complicated situations, such as sequencing errors, an incomplete reference genome, high sequence divergence and SVs [5]. Therefore, the recovery rate is a proper measurement for evaluating the performance of ConnectedReads and SRS. Recovery refers to the regions of the reference genome that have no short reads mapped by using Genome Analysis Toolkit (GATK) Best Practices (i.e., BWA-MEM) [11] but have mapping records in the ConnectedReads dataset by using minimap2 [12]. In terms of NA12878 mapping recovery, as illustrated in Fig. 1, there is a 15%-90% recovery rate for each chromosome (excluding chrY). For example, chr1 has 319,018 uncovered bps with SRS, but 135,253 bps (42.4%) can be recovered by ConnectedReads. The best recovery rate (89.6%) is on chr21, and the worst recovery rate (15.4%) is on chr17. Large regions are often

1 recovered when large deletions occur. Overall, ConnectedReads is able to  
2 reconstruct the mapping information for uncovered regions in the reference  
3 genome by using SRS data, and it may be the best candidate complementary to  
4 Illumina short-read data.

5

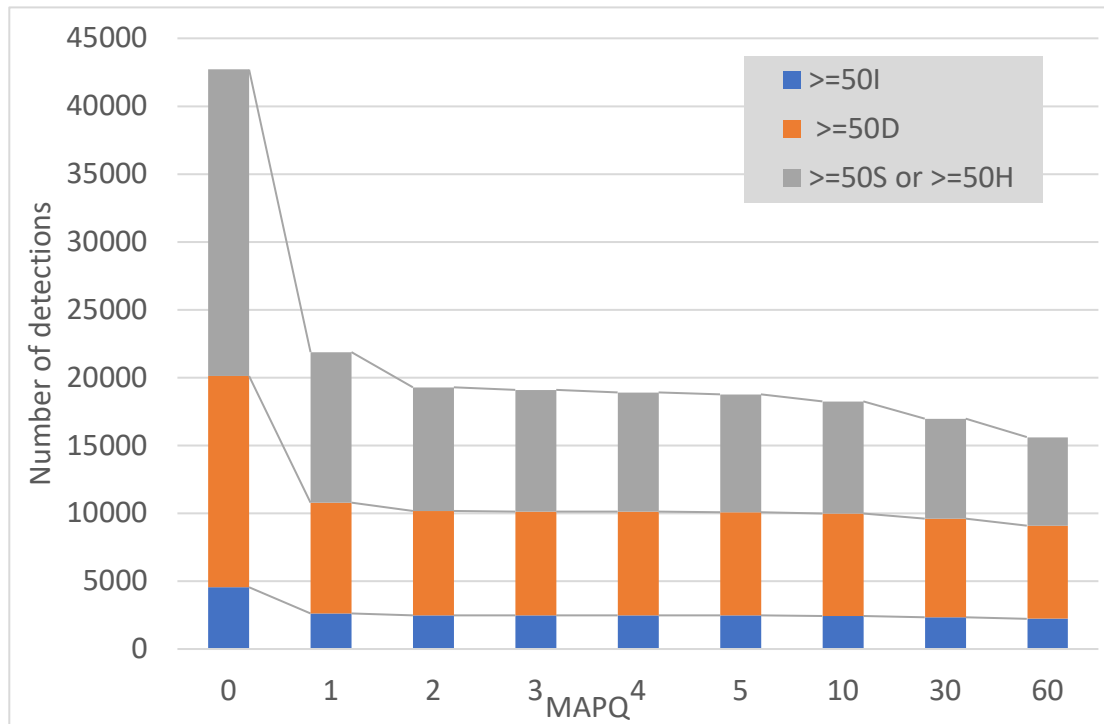

6

7 **Fig. 2.** Number of SV vs. MAPQ (NA12878). The priority order used for  
8 counting is insertion > deletion > soft-/hard-clipped sequence. Any two  
9 SVs will be merged if their distance is less than 50 bps. This means that if  
10 one insertion and one deletion are encountered in the same location, only  
11 one insertion is counted.

12

13 Second, SV detection remains a challenge in SRS [13]. Using ConnectedReads  
14 technology will significantly mitigate this challenge because ConnectedReads  
15 has the same competitive advantage as long-read sequencing (LRS) from  
16 Nanopore [14] and PacBio [15]. The longer the read is, the more correct the  
17 mapping result is and the more easily SVs can be found. Fig. 2 shows the  
18 numbers of insertions and deletions identified in NA12878. The method is  
19 simply based on a CIGAR string generated by minimap2. When the threshold  
20 of mapping quality (MAPQ) is increased, fewer insertions and deletions are  
21 identified. Since several alignment records with an MAPQ of 0 were falsely  
22 mapped in our investigation, the threshold of MAPQ was set to 1 in the

1 following experiments to balance the precision and sensitivity of SV detection.  
2 In addition, several recent studies have revealed that every human genome has  
3 approximately 20,000 SVs that span at least 10 million bps [16, 17].  
4 ConnectedReads identifies 21,855 SVs, and the number of SVs is similar to that  
5 obtained in previous studies [16, 17].  
6

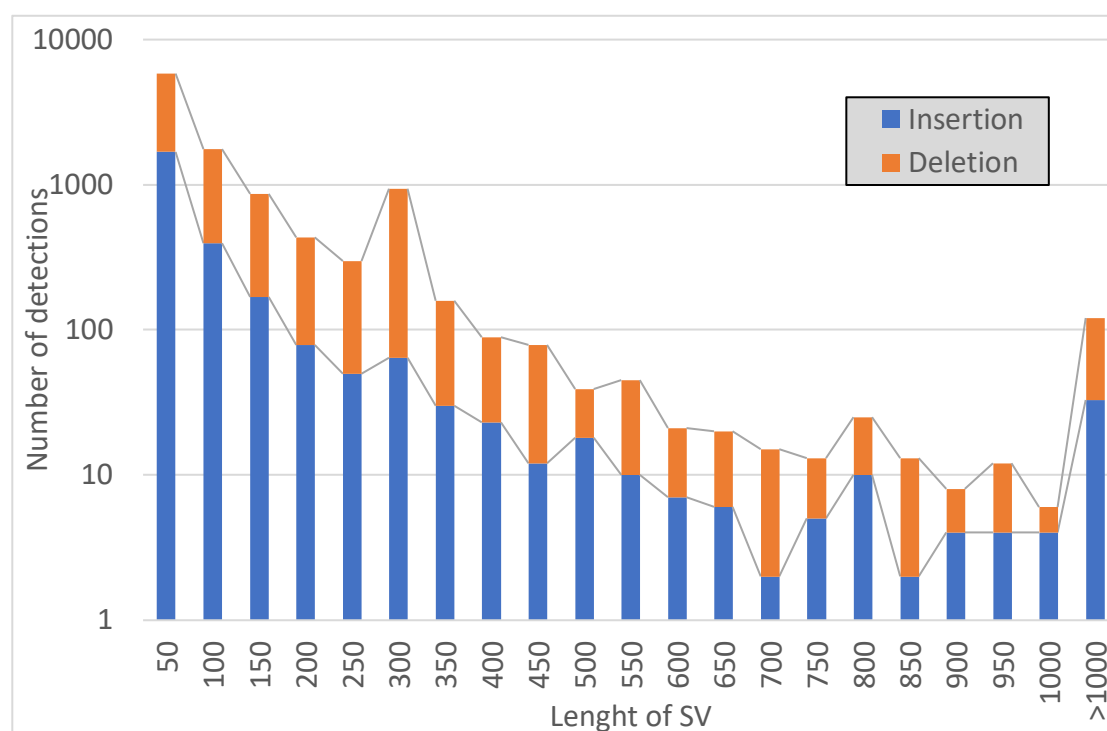

7  
8 **Fig. 3.** SV length distribution of NA12878. The peak at a length of 251-300  
9 is attributed primarily from Alu elements.

10

11 Furthermore, an interesting phenomenon is observed when the insertions and  
12 deletions shown in Fig. 2 are sorted by length (Fig. 3). Based on the 1000  
13 Genomes Project and several studies [18, 19], the number of SVs decreases as  
14 the length of the SVs increases. Therefore, the majority of the SVs are small  
15 indels (<50 bps). Then, the trend of the distribution slightly decreases as the  
16 length of the SVs increases, except for the peak at 250-300 bps. This change is  
17 due to abundant Alu elements whose body lengths are approximately 280 bases  
18 [20]. In addition, several studies have reported this phenomenon when using  
19 PacBio LRS [16]. Therefore, ConnectedReads is able to complement SRS in not  
20 only mapping coverage but also SV detection.

21

# 1 Comparison against a high-confidence 2 truth set

3 To evaluate the sensitivity of ConnectedReads in SV detection, the benchmark  
4 dataset collected by svclassify [7] is used. Since insertions are more difficult to  
5 detect than deletions, the 68 high-confidence insertions from svclassify are  
6 chosen as the insertion benchmarks in this paper. Additionally, two well-known  
7 variant callers are selected for performance evaluation: pbsv [21] for PacBio  
8 LRS and FermiKit [22] for Illumina SRS. Both FermiKit and ConnectedReads  
9 adopt assembly-based approaches to prevent reference bias. The results for the  
10 insertion benchmark data are listed in Table 3. PacBio LRS data are usually able  
11 to cover the whole region of most SVs, so pbsv achieves a 91.2% detection rate.  
12 However, FermiKit detects only 28 insertions since it aims to construct the  
13 complete sequence for each insertion. Since most WGS samples are sequenced  
14 by SRS and have a coverage of approximately 30X, it is quite hard to reconstruct  
15 the complete sequence (including novel insertions) through de novo assembly.  
16 Therefore, ConnectedReads provides a naïve insertion caller to relax the  
17 constraint by proposing three levels of detection, namely, completely detected,  
18 partially detected, and potentially detected. The ConnectedReads<sup>INS</sup> caller has  
19 a strict criterion because it is based on both completely detected and partially  
20 detected insertions. The ConnectedReads<sup>SV</sup> caller has a lenient criterion  
21 because it accommodates all three levels of detection. As shown in Table 3,  
22 ConnectedReads<sup>INS</sup> and ConnectedReads<sup>SV</sup> achieve 86.8% and 95.6% detection  
23 rates, respectively, indicating that ConnectedReads is able to achieve the same  
24 level of insertion-detection performance as PacBio LRS. Therefore, the above  
25 experimental results give us confidence to investigate SVs in population-scale  
26 data.

27  
28  
29  
30  
31  
32  
33



1 **Table 3.** Long insertion benchmarks in NA12878 from svclassify

| Method                        | Detection rate (%) | Number of insertions<br>with complete sequences |
|-------------------------------|--------------------|-------------------------------------------------|
| pbsv (PacBio)*                | 91.2               | 62                                              |
| FermiKit                      | 41.2               | 28                                              |
| ConnectedReads <sup>INS</sup> | 86.8               | 32                                              |
| ConnectedReads <sup>SV</sup>  | 95.6               | 32                                              |

2 \*The result of pbsv from NIST's Genome in a Bottle (GIAB) project is available at ftp://ftp-  
3 trace.ncbi.nlm.nih.gov/giab/ftp/data/NA12878/analysis/PacBio\_pbsv\_05212019/HG001\_GRCh38.pbs  
4 v.vcf.gz

5

6 Therefore, ConnectedReads is competent at SV detection, especially for  
7 insertions. Then, the next question that we are interested in is how many unique  
8 SVs exist in each population. According to Kehr's findings (in Table S4 of [9]),  
9 there are 372 SVs in all Icelanders. After removing redundant SVs and merging  
10 adjacent SVs, 248 distinct SVs are represented as the second set of benchmark  
11 data in this paper. We are eager to know whether these 248 SVs are unique to  
12 Icelanders or shared by all populations. Therefore, the three samples from  
13 different continents shown in Table 1 are processed by ConnectedReads, and  
14 then minimap2 is used to generate alignment records for their ConnectedReads  
15 contigs. Then, we manually evaluate whether the 248 SVs exist in the three  
16 samples and show the result in Table 4. More than 95% of the SVs found in all  
17 Icelanders are found in the three different populations, and only one SV cannot  
18 be found in any of the three given samples. It is obvious that most common SVs  
19 in Icelanders are not unique to Icelanders. Additionally, approximately 40 SVs  
20 should not be classified as SVs in the given samples because they are composed  
21 of multiple small variants. More details will be discussed in the next section. It  
22 is believed that ConnectedReads provides us with better resolution than other  
23 tools to observe SVs.

24

25

26

27

28

1 **Table 4.** The SV benchmarks from all Icelanders.

| Sample  | Race      | Detected |                         | Undetected |           |
|---------|-----------|----------|-------------------------|------------|-----------|
|         |           | SV       | Multiple small variants | Not found  | Uncovered |
| NA12878 | Caucasian | 204      | 39                      | 2          | 3         |
| NA24694 | Asian     | 198      | 40                      | 2          | 8         |
| NA19240 | African   | 205      | 39                      | 1          | 3         |

2

## 3 Discussion

### 4 Accuracy of insertion length

5 In the above section, ConnectedReads not only was complementary to the  
6 resequencing pipeline of SRS in terms of uncovered regions but also was able  
7 to detect SVs, especially long insertions. For example, at least 85% of long  
8 insertions can be detected by ConnectedReads, and 32 insertions are  
9 completely constructed, as shown in Table 3. Interestingly, most of the  
10 insertion sequences constructed by ConnectedReads are shorter than those in  
11 the report provided by svclassify. Since svclassify leverages Spiral Genetics to  
12 identify the 68 high-confidence insertions, PacBio LRS is adopted as an  
13 independent reference. As shown in Fig. 4(a), most of the insertions identified  
14 by ConnectedReads are apparently shorter than those identified by Spiral  
15 Genetics. However, Fig. 4(b) shows that 24 of 32 insertions have identical  
16 lengths when identified by PacBio and ConnectedReads. In addition, the  
17 remaining insertions have only slight differences. The difference between the  
18 results from svclassify and ConnectedReads could have two major causes. First,  
19 sequencing-related issues, including wet-laboratory processes and sequencing  
20 platforms, should be the main cause. Second, the different data analysis  
21 pipelines will lead to different results, especially when using different genome  
22 references. ConnectedReads and PacBio adopt HG38, but svclassify uses HG19.  
23 For comparison, the insertions provided by Spiral Genetics are transferred to  
24 HG38 by using UCSC LiftOver [23]. The step for transforming the coordinates  
25 might also lead to inconsistencies. Regardless, ConnectedReads with SRS can  
26 construct complete and accurate insertion sequences as well as PacBio LRS can.

27

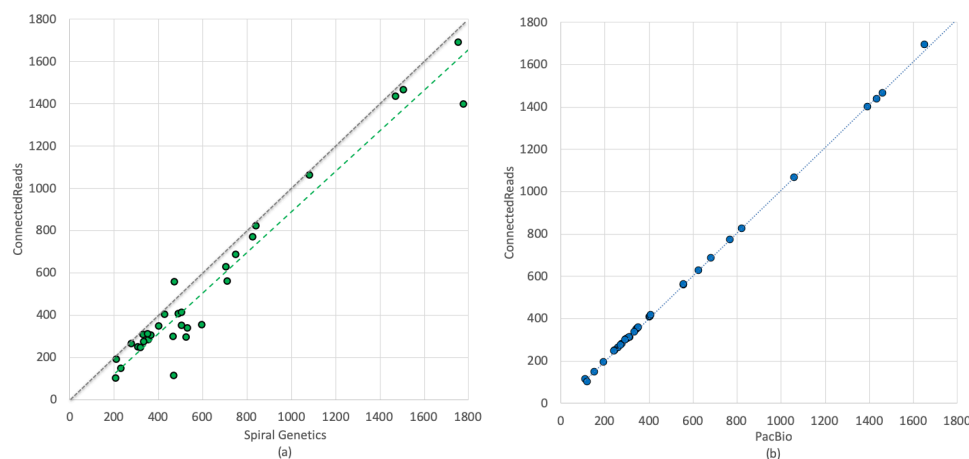

1  
2  
3  
4  
5  
6

**Fig. 4.** Comparison of insertion lengths among three approaches. (a) Spiral Genetics vs. ConnectedReads, (b) PacBio vs. ConnectedReads. The gray dashed line is the 1:1 line. The green and blue dashed lines in (a) and (b), respectively, represent the moving average of the comparison.

## 7 Granularity of SV detection

8 Another interesting phenomenon shown in Table 4 caught our attention.  
9 Although common SVs in Icelanders exist in different populations,  
10 approximately 40 of the SVs should not be classified as SVs ( $\geq 50$  bps) because  
11 they are composed of multiple small variants, as illustrated in Fig. 5. Fig. 5(a)  
12 and Fig. 5(b) contain only 13 SNPs and 13 deletions spanning 60 bps and 80  
13 bps, respectively. When many adjacent variants occur in any individual, most  
14 mapping tools have limited information with which to correctly arrange reads  
15 with many adjacent variants and then straightforwardly choose to either  
16 employ soft/hard clipping or categorize them as unmapped. This limitation will  
17 somehow guide most variant callers to identify these regions as SVs.  
18 ConnectedReads can prevent such false mapping and help variant callers detect  
19 the adjacent variants correctly and precisely.

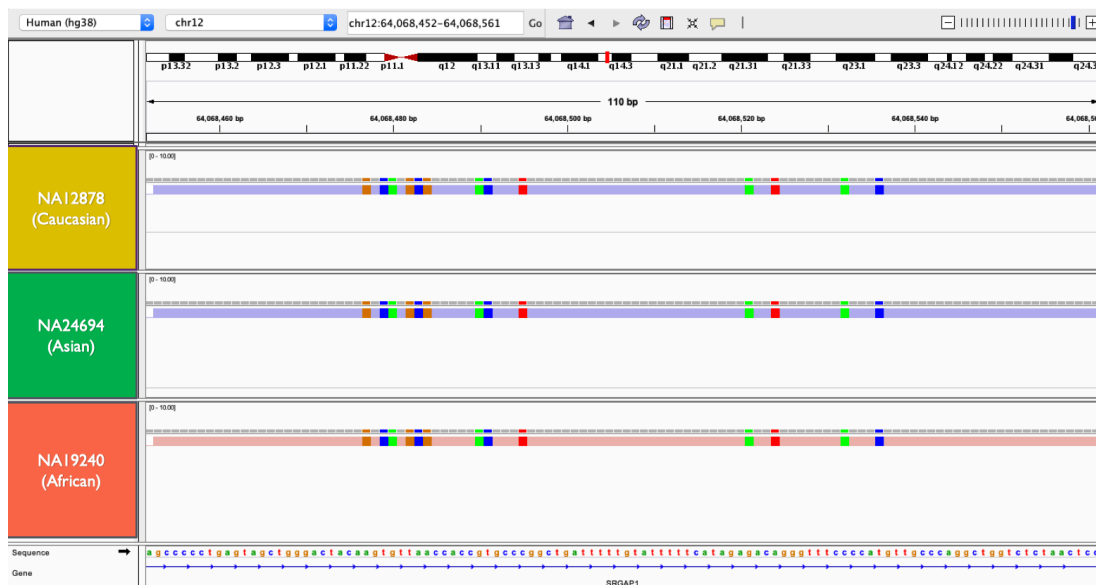

1  
2

(a) Multiple SNPs

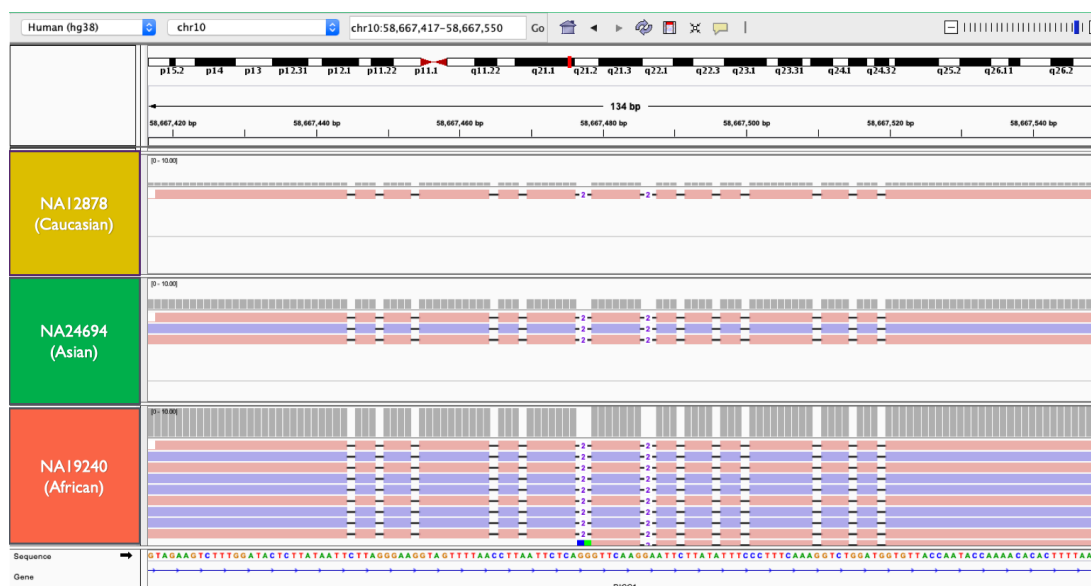

3  
4

(b) Multiple deletions

5 **Fig. 5.** Examples of NRNR sequences (multiple small variants). (a) Thirteen  
6 adjacent SNPs in the intron of SRGAP1. (b) Thirteen adjacent deletions in  
7 the intron of BICC1.

8

9 Furthermore, ConnectedReads is able to mitigate the impact on downstream  
10 analysis due to the incomplete human reference genome. The most recent  
11 human genome still has many ambiguous areas (N-gaps), and they are mainly  
12 located in centromeres and telomeres. Fig. 6 illustrates that two ambiguous  
13 gaps can be assembled by using ConnectedReads and that the sequences are  
14 totally identical among the three individuals from different populations. This  
15 finding gives us strong confidence that most humans might have the same

1 sequence in the two N-gap regions. By randomly selecting two Chinese adults,  
 2 the occurrence of identical sequences in the N-gap regions is confirmed by  
 3 Sanger sequencing, as performed by a Clinical Laboratory Improvement  
 4 Amendments (CLIA)-certificated laboratory. The length of the ambiguous  
 5 region in Fig. 6(a) should be corrected from 382 to 223 bps. In addition, the  
 6 length of ambiguous regions in Fig. 6(b) should be shortened from 45 to 31.  
 7 Based on these cases, ConnectedReads is able to provide a cost-effective  
 8 approach with which to complete the human reference genome.

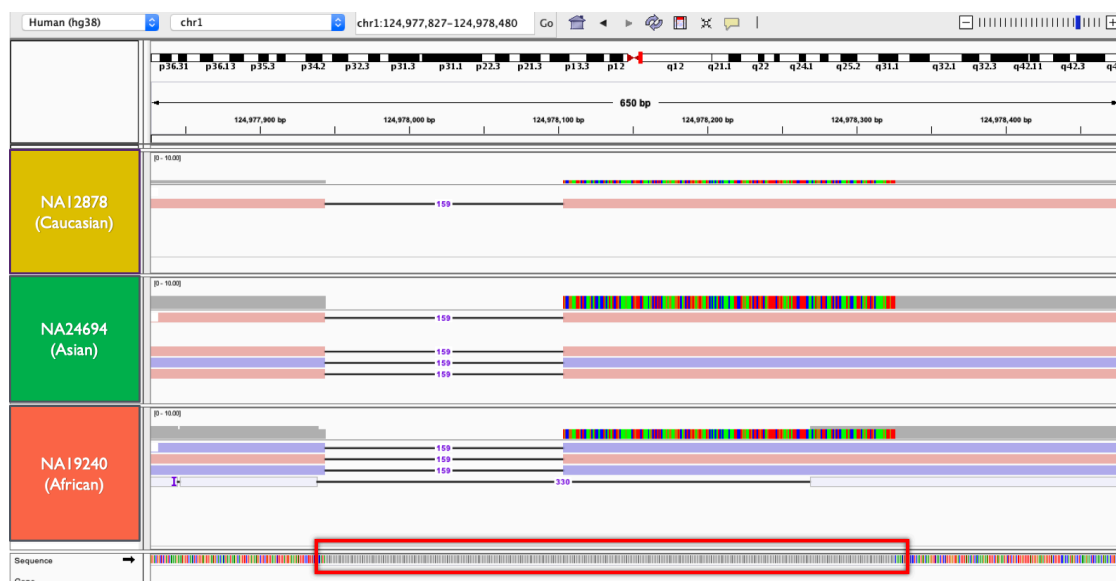

9  
10

(a) N-gap near centromere of chr1

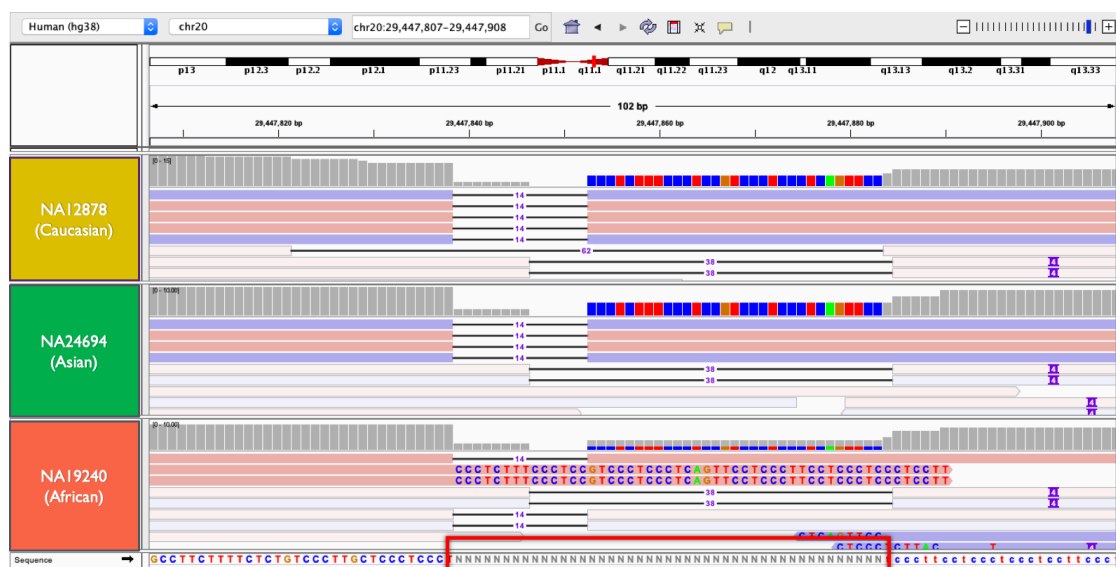

11  
12  
13  
14  
15

(b) N-gap near centromere of chr20

**Fig. 6.** The contigs from three individuals cross the entire N-gap regions near the centromere of (a) chromosome 1 and (b) chromosome 20. Based on the alignment result, the sequences in the N-gap are identical among

1 the three individuals. (a) The genomic location of IGV is  
2 chr1:124,977,874-124,978,413 of HG38. (b) The genomic location of IGV  
3 is chr20:29,447,807-29,447,908 of HG38.  
4

## 5 Correctness of sequence assembly

6 The next topic for the evaluation of ConnectedReads is correctness. To  
7 comprehensively investigate the sequence assembly correctness of  
8 ConnectedReads, insertion sequences, soft-clipped sequences and unmapped  
9 contigs are selected and then identified as being from *Homo sapiens* or just  
10 chimeric DNA sequences resulting from false reconstruction. After removing  
11 sequences with a length < 1,000 bps, there are 37, 384 and 411 insertions, soft-  
12 clipped sequences and unmapped contigs, respectively. By using BLAST to find  
13 any homologous sequences in the National Center for Biotechnology  
14 Information (NCBI) non-redundant sequence (nr) database, each sequence can  
15 be identified as human or not. As shown in Fig. 7, 35.1%, 46.6% and 37.7% of  
16 the insertions, soft-clipped sequences and unmapped contigs are identical to  
17 *Homo sapiens* DNA sequences in the nr database. As the threshold of similarity  
18 is continuously lowered, more evidence can be found to support the sequence  
19 assembly correctness of ConnectedReads. However, there are six sequences  
20 without any support when the threshold is set to 20%. Two of the contigs have  
21 low-complexity content, and two are matched to several entries but with less  
22 than 10% support. The last two unmapped contigs (CONTIG-8337086 and  
23 CONTIG-15793805) are more than 10 Kbps in length. CONTIG-15793805  
24 covers all of CONTIG-8337086 in reverse-complement mode, so CONTIG-  
25 15793805 is represented and shown in Fig. 8. CONTIG-15793805 is almost fully  
26 covered by several *Homo sapiens* sequences, some of which overlap. Therefore,  
27 these non-reference contigs constructed by ConnectedReads are all from *Homo*  
28 *sapiens*. Based on the above findings, ConnectedReads achieves high data  
29 correctness.  
30

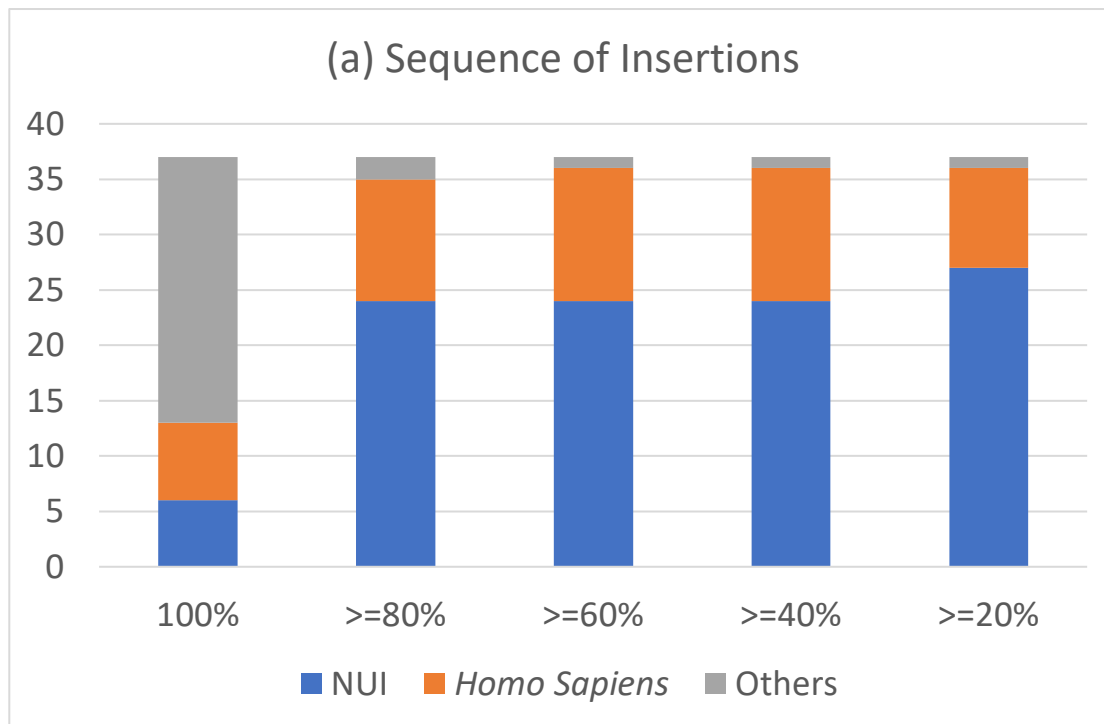

1

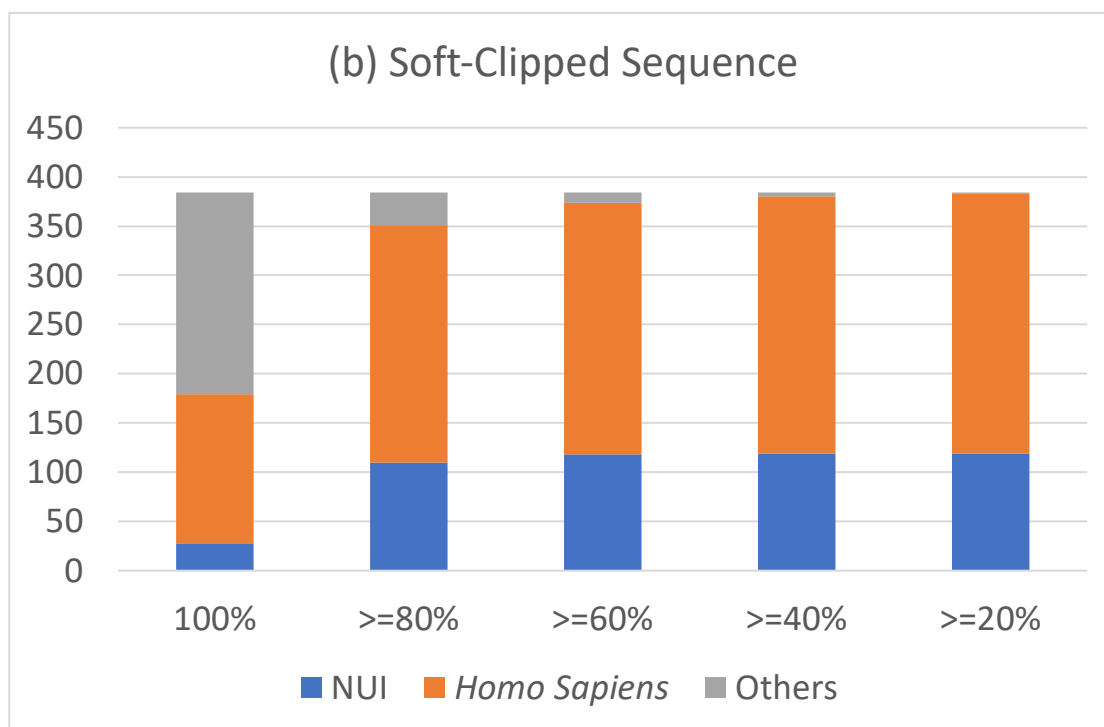

2

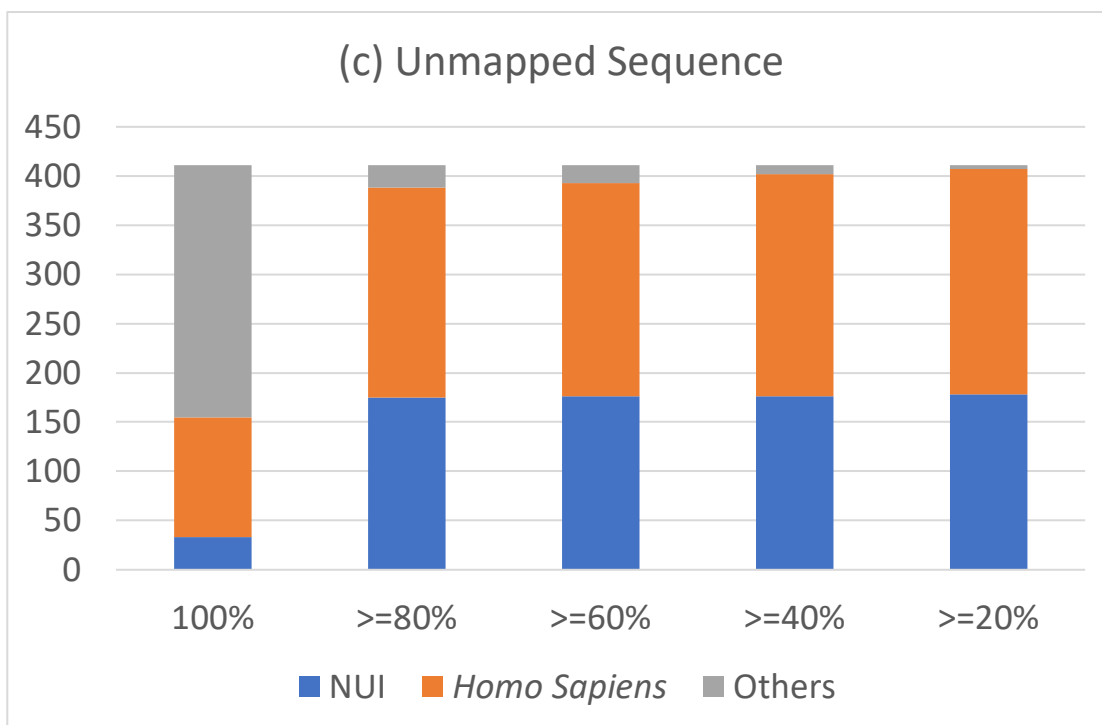

1

2 **Fig. 7.** Distribution of BLAST queries for non-reference sequences identified  
 3 by ConnectedReads. (a) From insertions, (b) from soft-clipped sequences  
 4 and (c) from unmapped contigs. The x-axis shows the similarity of the  
 5 query results by BLAST. NUI means that the matched result is annotated  
 6 as a non-reference unique insertion. Homo sapiens means that the  
 7 matched result is from Homo sapiens or Human BAC.

8

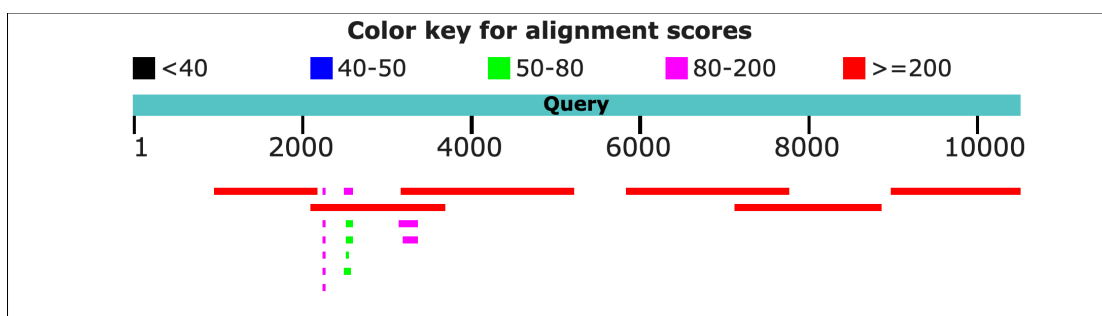

9

| Alignments                                                                                  |           |             |             |         |            |                            |
|---------------------------------------------------------------------------------------------|-----------|-------------|-------------|---------|------------|----------------------------|
| Download GenBank Graphics Distance tree of results                                          |           |             |             |         |            |                            |
| Description                                                                                 | Max Score | Total Score | Query Cover | E value | Per. Ident | Accession                  |
| <input type="checkbox"/> <a href="#">Homo sapiens contig freeze2_5643 genomic sequence</a>  | 3631      | 3631        | 19%         | 0.0     | 98.64%     | <a href="#">GU268331.1</a> |
| <input type="checkbox"/> <a href="#">Homo sapiens contig freeze2_5946 genomic sequence</a>  | 3225      | 3225        | 18%         | 0.0     | 97.10%     | <a href="#">GU268394.1</a> |
| <input type="checkbox"/> <a href="#">Homo sapiens contig freeze2_14419 genomic sequence</a> | 3192      | 3192        | 16%         | 0.0     | 99.60%     | <a href="#">GU267253.1</a> |
| <input type="checkbox"/> <a href="#">Homo sapiens contig freeze2_6361 genomic sequence</a>  | 2844      | 4436        | 15%         | 0.0     | 98.81%     | <a href="#">GU268479.1</a> |
| <input type="checkbox"/> <a href="#">Homo sapiens contig freeze2_12421 genomic sequence</a> | 2808      | 2808        | 14%         | 0.0     | 99.74%     | <a href="#">GU267004.1</a> |
| <input type="checkbox"/> <a href="#">Homo sapiens contig freeze2_12454 genomic sequence</a> | 2169      | 2544        | 11%         | 0.0     | 98.93%     | <a href="#">GU267012.1</a> |
| <input type="checkbox"/> <a href="#">Bos mutus isolate yakQH1 chromosome 12</a>             | 196       | 196         | 2%          | 1e-44   | 82.74%     | <a href="#">CP027080.1</a> |

10



1 **Fig. 8.** BLAST result for CONTIG-15793805. Six long *Homo sapiens* contigs  
2 are identified with low E-values. Since some of them overlap, the  
3 alignment result gives us strong confidence in the data correctness of  
4 ConnectedReads.

5

## 6 Translocation-based insertions

7 Furthermore, another way to evaluate the data correctness of ConnectedReads  
8 is to check whether there is any translocation. If any two unrelated sequences  
9 are incorrectly assembled together, it will cause a fake translocation event, in  
10 which a contig is mapped to multiple chromosomes. Table 5 lists the 13,686  
11 contigs with multiple alignment records on two chromosomes in sample  
12 NA12878. After removing singletons and filtering out low-MAPQ records  
13 (MAPQ < 60), 71 qualified contigs are represented by 22 translocation groups.

14

15 **Table 5.** Translocation-based insertions in NA12878.

| Item                                                 | Number |
|------------------------------------------------------|--------|
| Number of contigs mapped on at least two chromosomes | 13,686 |
| Number of contigs after removing singletons          | 2,075  |
| Number of qualified contigs                          | 71     |
| Number of high-confidence translocation groups       | 22     |
| Number of translocation-based insertions             | 8      |

16

17 Interestingly, eight translocation groups have one clear breakpoint on one  
18 chromosome but two breakpoints on another chromosome. As shown in Fig.  
19 9(a), for example, CONTIG-6374680 and CONTIG-1880453 have identical  
20 breakpoints at chr3:110694547. However, CONTIG-6374680 and CONTIG-  
21 1880453 have their own breakpoints at chr1:108952231 and chr1:108952660,  
22 respectively. Thus, in NA12878, the 430-bp sequence in intron 1 of CLCC1 is  
23 inserted at chr3:110694547. Fig. 9(b) also shows that the 697-bp sequence in  
24 exon 10 of BTBD7 is inserted into intron 1 of SLC2A5. These translocation  
25 groups are called translocation-based insertions. ConnectedReads proposes a  
26 naïve way to investigate these translocation-based insertions. In summary,

1 ConnectedReads not only constructs genome sequences precisely but also  
2 facilitates SV detection by mitigating reference mapping bias.

3

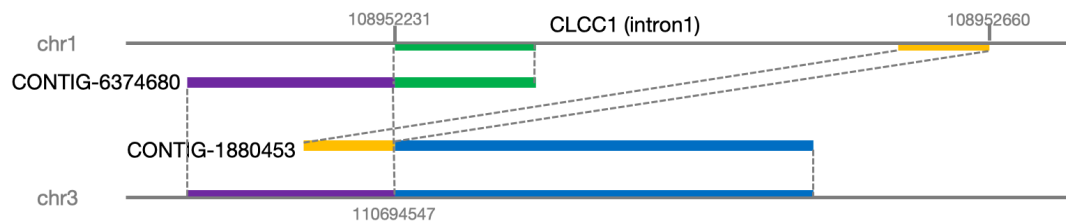

4

5

(a) Insertion sequence from CLCC1 intron 1

6

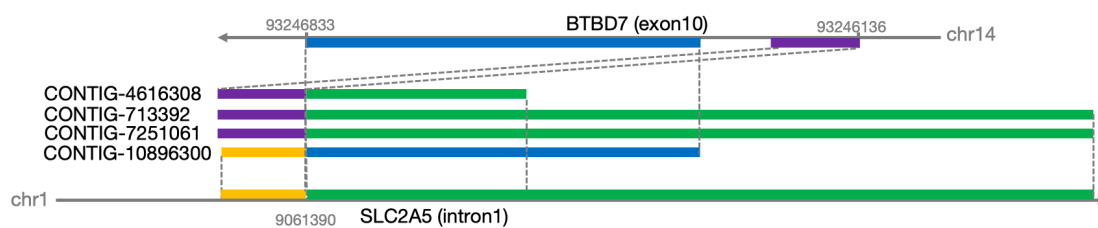

7

8

(b) Insertion sequence from BTBD7 exon 10

9

10 **Fig. 9.** Examples of translocation-based insertions. (a) The 429-bp sequence  
11 from intron 1 of CLCC1 is inserted at chr3:110,694,547. (b) The 697-bp  
12 sequence from exon 10 of BTBD7 is inserted into intron 1 of SLC2A5.

13

## 14 Conclusions

15 ConnectedReads leverages SRS to generate long haplotype-resolved contigs  
16 such as those produced by 3rd-generation sequencing technologies (i.e., PacBio  
17 and Nanopore) to not only prevent mapping errors but also facilitate SV  
18 discovery. In summary, ConnectedReads can serve as an NGS gateway for  
19 streamlining downstream data analysis, such as false positive prevention, SV  
20 detection, and haplotype identification.

# 1 Materials and methods

## 2 Workflow

3 ConnectedReads leverages Apache Spark [6], a distributed in-memory  
4 computing framework, to accelerate its whole workflow, as illustrated in Fig. 10.  
5 To fully utilize the power of the distributed framework, the preprocessing step  
6 involves splitting a large compressed file into several small files and then  
7 uploading those files into the Hadoop distributed file system (HDFS) since  
8 most of the WGS samples exist in two separate FASTQ files in GZIP format.  
9 First, we adopt Apache Adam [24], as shown in Fig. 10(a), to transform data  
10 from FASTQ format to column-based Parquet format for data parallel access.  
11 To facilitate data processing in the following steps, we extend Adam to not only  
12 encode paired-end information and barcodes into the read name column but  
13 also place all reads in different subfolders based on their sequencing quality and  
14 sequence complexity. Then, we propose a distributed suffix tree algorithm with  
15 supervised graph mining on Spark to mitigate the influence of improper string  
16 graph construction due to sequencing errors. Using an outlier detection  
17 algorithm on a suffix tree, the process in Fig. 10(b) can be configured as a highly  
18 sensitive error detector for low-coverage regions. After that, we are able to  
19 adopt the parallel string graph construction shown in Fig. 10(c) to represent the  
20 relation of each qualified read and the read overlaps by suffix-prefix  
21 information. More details are available in our previous paper [25]. Based on the  
22 string graph, we propose the parallel haplotype-sensitive assembly (HSA)  
23 depicted in Fig. 10(d) to construct haplotype-resolved contigs; the detailed  
24 procedure of this module will be described in the next session. For example,  
25 these generated contigs (Fig. 10) include (i) heterozygous SNPs, (ii)  
26 heterozygous deletions, (iii) heterozygous insertions and (iv) homozygous SNPs.  
27 In summary, ConnectedReads transforms noisy short reads with low quality  
28 and sequencing errors to long and qualified contigs with clear haplotype  
29 information.

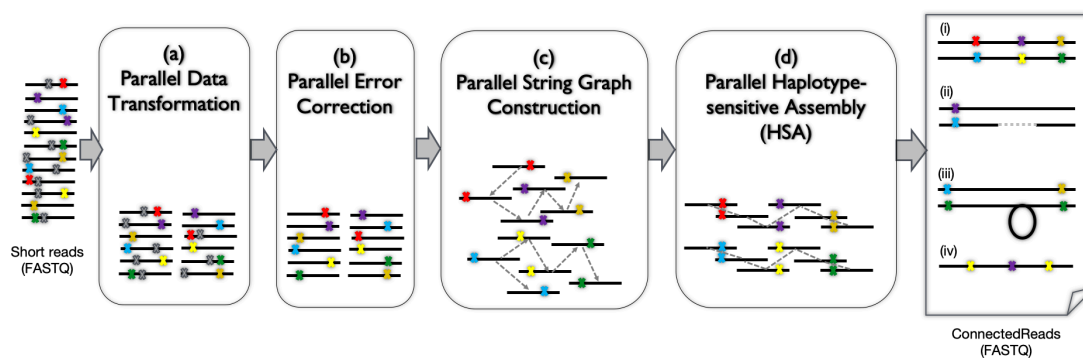

1

2 **Fig. 10.** Workflow of ConnectedReads. (a) Parallel data transformation. (b)  
 3 Parallel error correction. (c) Parallel string graph construction. (d)  
 4 Parallel haplotype-sensitive assembly (HSA).

5

## 6 Parallel HSA

7 ConnectedReads adopts a string graph, a lossless data representation that is  
 8 fundamental for many de novo assemblers based on the overlap-layout-  
 9 consensus paradigm [26, 27], to represent the overlaps of each read. Here, we  
 10 propose a Spark-based HSA based on a string graph. By leveraging GraphFrame  
 11 [28], HSA is able to perform efficient and scalable graph traversal operations  
 12 and supervised graph mining algorithms on Apache Spark. Before introducing  
 13 the detailed algorithms of HSA, we formally define the notations of the  
 14 sequencing data and string graph that we will use in the following sections.

## 15 Definitions and notation

16 Let  $G(V, E)$  be a directed graph and  $S, T \subseteq V$ . We define  $V = \{v_1, v_2, \dots, v_k\}$  and  
 17  $E(S, T)$  to be the set of edges going from  $S$  to  $T$ , i.e.,

$$18 \quad |V| = k \text{ and } E(S, T) = \{e_{ij} \in E : v_i \in S, v_j \in T \text{ and } i < j \leq k\}.$$

19 **Definition 1.** Let  $R$  be the set of short reads and  $R^{RC}$  be the reverse  
 20 complement set of  $R$ .  $G$  and  $G^{RC}$  are the string graphs based on  $R$  and  $R^{RC}$ ,  
 21 respectively. If  $e_{ij}$  exists in  $G$  and  $i, j \in R$ , then  $e_{mn}$  also exists in  $G^{RC}$  and  
 22  $m, n \in R^{RC}$  such that  $m$  and  $n$  are the reverse complements of  $j$  and  $i$ ,  
 23 respectively.

24 We define  $G^{EXT}(V, E)$  to be the expanded graph of vertices  $V \in R \cup R^{RC}$  and  
 25 edges  $E$  to be the set of edges in either  $G$  or  $G^{RC}$ .

1 **Definition 2.** Let  $IN(v_i)$  and  $OUT(v_i)$  be the number of in-degree and out-  
2 degree edges of  $v_i$ , respectively. We define a vertex  $v_i$  to be

3 **Singleton** if  $IN(v_i) = 0$  and  $OUT(v_i) = 0$ ;  
4 **Start(S)** if  $IN(v_i) = 0$  and  $OUT(v_i) = 1$ ;  
5 **Terminator(T)** if  $IN(v_i) = 1$  and  $OUT(v_i) = 0$ ;  
6 **Bridge(B)** if  $IN(v_i) = 1$  and  $OUT(v_i) = 1$ ;  
7 and **Ambiguity(A)** if  $IN(v_i) \neq 1$  or  $OUT(v_i) \neq 1$ .

8 **Definition 3.** We define the priority order of the vertex labels to be  $\mathbf{T} > \mathbf{S} >$   
9  $\mathbf{B}$  and  $\mathbf{A}$ .

10 This means that  $\mathbf{B}$  could be relabeled as  $\mathbf{S}$  or  $\mathbf{T}$ . Once a vertex becomes  $\mathbf{T}$ , it will  
11 always be  $\mathbf{T}$  regardless of what the graph property propagation is.

12 To keep the depth information in FASTQ format, a new quality encoding  
13 function is proposed.

14 **Definition 4.** Let  $L$  and  $N$  be the numbers of layers for quality and depth,  
15 respectively.  $L*N$  should be 42 if Phred33 is adopted. Let  $Q[i]$  and  $D[i]$  be  
16 the quality and depth of the  $i$ -th base of the given contig, respectively. We  
17 define the quality encoding function  $Encoder_Q[i]$  and the depth encoding  
18 function  $Encoder_D[i]$  to be

$$Encoder_Q[i] = \left\lfloor \frac{Q[i] - ord(" ! ")}{N} \right\rfloor * N$$

$$Encoder_D[i] = \begin{cases} 0 & \text{if } D[i] == 1 \\ 1 & \text{if } 2 \leq D[i] < 4 \\ 2 & \text{if } 4 \leq D[i] < 7 \\ 3 & \text{if } 7 \leq D[i] < 11 \\ \dots & \\ N - 1 & \text{if } D[i] \geq 200 \end{cases}$$

21 In addition, we define the quality-depth (QD)-encoding function  
22  $Encoder_{QD}[i]$  to be

$$Encoder_{QD}[i] = chr(Encoder_Q[i] + Encoder_D[i] + ord(" ! "))$$

## 24 System flow

25 In Fig. 11, HSA makes use of five modules, namely, (a) string graph expansion,  
26 (b) vertex connectivity classification, (c) the Start-Bridge-Terminator (S-B-T)  
27 traversal algorithm, (d) the ploidy-based routing algorithm and (e) the triplet  
28 traversal algorithm. To simplify the following graph traversal algorithms, each  
29 vertex and its reverse complement should be separated in a string graph. This

1 means that the string graph  $G$  generated by Fig. 10(c) should first be expanded  
2 by Definition 1 and named  $G^{EXT}$ , which contains  $G$  and  $G^{RC}$ . For that reason, Fig.  
3 11(a) generates the expanded string graph with all reads and their reverse  
4 complements. After removing all singletons in  $G^{EXT}$ , the remaining vertices will  
5 be classified by the vertex connectivity classification module shown in Fig. 11(b)  
6 into four classes, which are defined in Definition 2: start (**S**), bridge (**B**),  
7 terminator (**T**) and ambiguity (**A**). To generate haplotype-sensitive contigs, the  
8 graph traversal/pairing algorithms shown in Fig. 11(c-e) are proposed based on  
9 the above properties of vertices and described comprehensively in the next  
10 section.

11

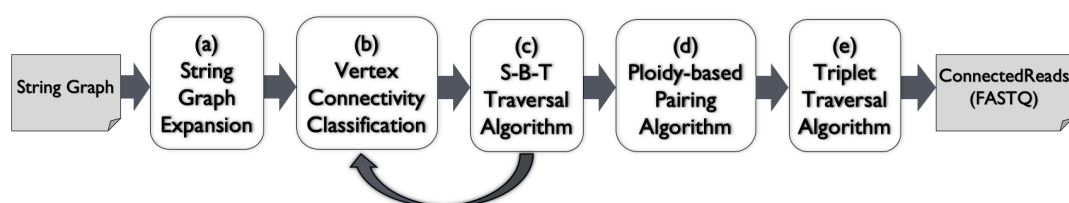

12

13 **Fig. 11.** Parallel haplotype-sensitive assembly (HSA). (a) String graph  
14 expansion. (b) Vertex connectivity classification. (c) S-B-T traversal  
15 algorithm. (d) Ploidy-based paired algorithm. (e) Triplet traversal  
16 algorithm.

17

## 18 Graph mining algorithms

19 ConnectedReads leverages Apache Spark and its derived packages to propose  
20 three efficient and scalable graph algorithms for large graphical datasets, i.e.,  
21 string graphs. Spark GraphFrame is a powerful tool for performing distributed  
22 computations with large graphical datasets. In addition, Spark Dataset is a  
23 type-safe interface that provides the benefits of resilient distributed datasets  
24 (RDDs) and Spark SQL optimization. By leveraging GraphFrame and Dataset,  
25 we propose several Spark-based graph traversal/routing algorithms for HSA  
26 with high performance and scalability.

27

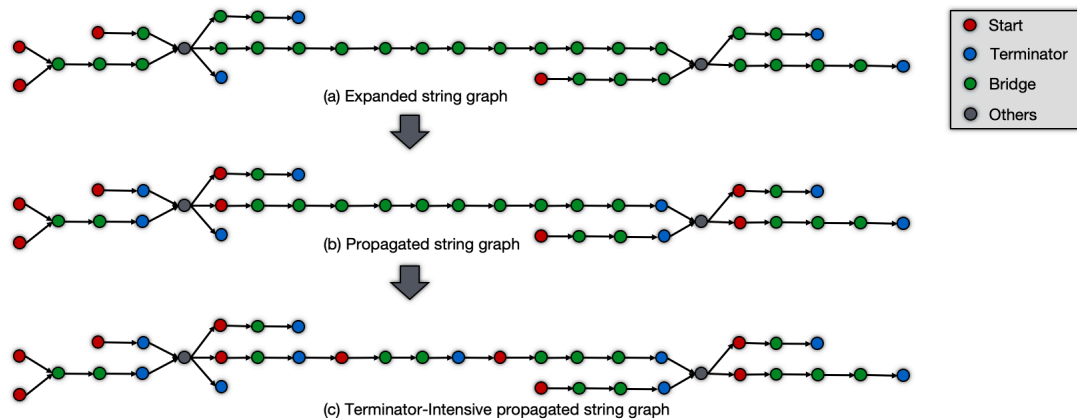

1

2 **Fig. 12.** An example to demonstrate the graph preprocessing workflow for the  
 3 S-B-T traversal algorithm. (a) Expanded string graph. (b) Propagated  
 4 string graph. (c) Terminator-intensive propagated string graph.

5

6 From our observations of NGS sequencing data, two challenges must be  
 7 overcome if we want to enhance the performance of graph operation for HSA.  
 8 The first challenge in the string graph involves long diameters, and the second  
 9 challenge is how to properly connect the vertices with multiple in-/out-degrees.  
 10 Taking NA12878 as an example, more than 90% of the vertices are **B**, and the  
 11 longest diameter from **S** to **T** is more than 500. This means that the traversal  
 12 algorithm must perform the propagation operation in at least 500 iterations  
 13 from one vertex (**S**) to another vertex (**T**). For most graph frameworks, the  
 14 performance of a graph algorithm is strongly related to the number of iterations  
 15 for its traversal operation. Here, we propose the S-B-T traversal algorithm,  
 16 shown in Fig. 11(c), to connect all vertices from **S** to **T** via all adjacent **B**s. By  
 17 following Definition 3, the data preprocessing flow for the expanded string  
 18 graph is applied, as illustrated in Fig. 12. First, all vertices before and after any  
 19 vertex **A** should be relabeled as **T** and **S**, respectively. To overcome the long-  
 20 diameter problem, the mechanism used to relabel **B** to **T** by customized random  
 21 selection is applied to shorten the diameter of the given graph, and then, the  
 22 terminator-intensive propagated string graph is acquired. Based on the  
 23 terminator-intensive graph, the S-B-T traversal algorithm, which integrates a  
 24 belief propagation algorithm with iterative graph merging, is able to  
 25 theoretically reduce the time complexity from  $O(N)$  to  $O(\sqrt{N})$  ( $N$ : the number  
 26 of iterations for graph propagation).

1 When each simple routing path (i.e., **S** to **T** via **Bs**) is completely traversed and  
2 merged into a single vertex in the new graph, the majority of the vertices have  
3 multiple in-/out-degrees. Therefore, we have to solve the second challenge -  
4 how to select a proper routing path in the multiple-in-/out-degree graph. Many  
5 useful indicators enable us to perform correct routing, such as read pairs,  
6 barcodes and read overlaps. The pseudo code of the ploidy-based pairing  
7 algorithm shown in Fig. 11(d) is as follows:

```
8 def ploidy_based_pairing(G: GraphFrame for string graph, N: int for ploidy) {  
9     Candidates =  $\emptyset$   
10     $V_a$  = all of As in G  
11    for each  $v \in V_a$  {  
12         $I_v$  = the set of vertices point to  $v$   
13         $O_v$  = the set of vertices pointed by  $v$   
14         $D_v$  = de_noise( $I_v$ ,  $v$ )  
15         $T$  =  $\emptyset$   
16        for each  $u \in D_v$  {  
17            ( $t$ ,  $s$ ) = find_best_matching( $u$ ,  $v$ ,  $O_v$ )           # $t$ : triple ;  $s$ : score  
18            if  $s \geq \text{MIN\_THRESHOLD}$  then  
19                add ( $t$ ,  $s$ ) into  $T$   
20            }  
21            sort  $T$  by score  
22            add the top N triples from  $T$  into Candidates  
23        }  
24    return Candidates  
25 }
```

26 To mitigate false assembly due to sequencing errors, the function **de\_noise()**  
27 is used to remove the noisy vertices in  $I_v$  by using a naïve clustering algorithm  
28 based on the read-pair information in this paper. In addition, the function  
29 **find\_best\_matching()** adopts a tripartite clustering algorithm based  
30 primarily on the number of supports from read-pair information in  $(u, v)$ ,  $(u,$   
31  $O_v)$  and  $(v, O_v)$  to find the best combination for sequence assembly. Using the  
32 ploidy-based pairing algorithm, we obtain sufficient information to overcome  
33 the second challenge and then apply the triplet traversal algorithm shown in  
34 Fig. 11(e) to construct the haplotype-sensitive contigs by traversing the  
35 aggregated graph from each **S** to **T** via the triple set generated by the ploidy-



1 based pairing algorithm. The triplet traversal algorithm involves almost the  
2 same procedures as the S-B-T traversal algorithm, except for the linkage of  
3 vertexes. In summary, HSA leverages Apache Spark to efficiently generate  
4 haplotype-sensitive contigs from a large string graph.

## 5 Performance

6 Here, sample NA12878 is processed by ConnectedReads on our Spark cluster.  
7 It takes approximately 18 hours for the 30X WGS sample; the detailed  
8 performance of ConnectedReads is described in Table 6.

9

10 **Table 6.** Execution time for NA12878

| Module                                    | Time (hours) | # Executors | # Cores per executor |
|-------------------------------------------|--------------|-------------|----------------------|
| (a) Parallel data transformation          | 1.9          | 9           | 17                   |
| (b) Parallel error correction             | 8.1          | 15          | 8                    |
| (c) Parallel string graph construction    | 4.3          | 9           | 17                   |
| (d) Parallel haplotype-sensitive assembly | 4.0          | 9           | 17                   |
| Data export from HDFS to local disk       | 0.05         | 9           | 4                    |
| Total                                     | 18.3         |             |                      |

11 \*There are 9 computing nodes (each node has two E502650 v4 with 512 GB of memory)

12

## 13 QD encoder/decoder

14 Since ConnectedReads not only connects reads with their overlaps but also  
15 aggregates identical reads, the size of ConnectedReads contigs will be reduced  
16 by at least 90% in comparison with that of contigs from short-read data.  
17 However, the downstream analysis tools might not work well due to the loss of  
18 depth information. We have to take the depth information into consideration  
19 and keep the output compatible with FASTQ format. Therefore, the QD encoder  
20 and decoder are proposed based on Definition 4 to mitigate the impact on  
21 information loss. The mechanism of the QD-encoding function is quite flexible,  
22 allowing it to fit most use cases. For example, if the depth information is more  
23 critical than quality,  $(L, N) = (3, 14)$  is the best choice. Fig. 13 provides an  
24 example to demonstrate how the QD encoder transforms short reads into  
25 ConnectedReads contigs. The data reduction rate is approximately 77% (from

1 144 characters to 33 characters in both sequence and quality). In addition, Fig.  
 2 14 shows the result of applying the QD-decoding function. The recovery rate in  
 3 terms of sequences and quality is 95.8% (138/144) and 47.3% (71/144),  
 4 respectively. Therefore, ConnectedReads provides an efficient QD-decoding  
 5 tool for some use cases that heavily leverages depth information.

|                                    | Sequence                         | Quality                          |
|------------------------------------|----------------------------------|----------------------------------|
| Short Reads<br>(144 nucleotides)   | R1 GCGTCTATATCTCG                | R1 JJJJIIIGGGJJJA,               |
|                                    | R2 GCGTCTATATCTCG                | R2 AJJJJHHHHI09,,                |
|                                    | R3 TCTATATCTCGGC                 | R3 JJJJJJJJJJJ0                  |
|                                    | R4 TCTATATCTCGGCTC               | R4 AJJJJJJ..../..                |
|                                    | R5 CTATATCTCGGCTCT               | R5 JJJJJJJJJJEEDD                |
|                                    | R6 TATCTCGGCTTAGG                | R6 AJJEEEEEEBBB<<                |
|                                    | R7 CTCGGCTTAGGC                  | R7 JJJJJJAAJJJJ                  |
|                                    | R8 CTCGGCTTAGGCC                 | R8 AJJJJEEGGG<=..                |
|                                    | R9 GCTCTAGGCCCTCAT               | R9 JIJJJJJJJJJAAA                |
|                                    | R10 TAGGCCCTCATTTT               | R10 JJJJJJJ+CCCCC                |
| ConnectedReads<br>(33 nucleotides) | GCGTCTATATCTCGGCTCTAGGCCCTCATTTT | =>>>@AAABBBDDDDCCBBBAAA@??>>>!!! |

6  
 7 **Fig. 13.** An example application of the QD encoder (taking  $(L, N) = (3, 14)$  as  
 8 an example).  
 9

|              | Sequence                         | Quality                          |
|--------------|----------------------------------|----------------------------------|
| Encoded Data | GCGTCTATATCTCGGCTCTAGGCCCTCATTTT | =>>>@AAABBBDDDDCCBBBAAA@??>>>!!! |
| Decoded Data | R1 GCGTCTATATCTCG                | R1 JJJJJJJJJJJJJJ                |
|              | R2 GCGTCTATATCTCGG               | R2 JJJJJJJJJJJJJJ                |
|              | R3 TCTATATCTCGGCTC               | R3 JJJJJJJJJJJJJJ                |
|              | R4 TCTATATCTCGGCTC               | R4 JJJJJJJJJJJJJJ                |
|              | R5 CTATATCTCGGCTCT               | R5 JJJJJJJJJJJJJJ                |
|              | R6 TATCTCGGCTTAGG                | R6 JJJJJJJJJJJJJJ                |
|              | R7 CTCGGCTTAGGCC                 | R7 JJJJJJJJJJJJJJ                |
|              | R8 CTCGGCTTAGGCC                 | R8 JJJJJJJJJJJJJJ                |
|              | R9 AGGCCCTCATTTT                 | R9 JJJJJJJJJJJ!!!                |
|              | R10 AGGCCCTCATTTT                | R10 JJJJJJJJJJJ!!!               |

10  
 11 **Fig. 14.** An example application of the QD decoder (taking  $(L, N) = (3, 14)$   
 12 and read length = 15 as an example).  
 13

## 14 Availability of data and materials

15 Data: The raw sequencing data discussed in this manuscript are deposited on  
 16 the European Bioinformatics Institute (EBI) and NCBI websites. NA12878 is  
 17 available from <https://www.ebi.ac.uk/ena/data/view/ERR2438055>; NA24694  
 18 and NA19240 are available from  
 19 <https://www.ncbi.nlm.nih.gov/sra/SRX1388455> and  
 20 <https://www.ncbi.nlm.nih.gov/sra/SRX4637790>, respectively.

1 Codes: The source code and scripts for the ConnectedReads workflow and the  
2 related experiments discussed in this paper are available at  
3 <https://github.com/atgenomix/connectedreads>.

## 4 Abbreviations

- 5 **CNV:** Copy number variant
- 6 **HDFS:** Hadoop distributed file system
- 7 **HSA:** Haplotype-sensitive assembly
- 8 **LRS:** Long-read sequencing
- 9 **NGS:** Next-generation sequencing
- 10 **NRNR:** Non-reference, non-repetitive
- 11 **QD:** Quality depth
- 12 **RDD:** Resilient distributed dataset
- 13 **SRS:** Short-read sequencing
- 14 **SV:** Structural variant
- 15 **UNI:** Unique non-reference insertion
- 16 **WGS:** Whole-genome sequencing

## 17 References

- 18 1. Esplin, E.D., L. Oei, and M.P. Snyder, *Personalized sequencing and the future of*  
19 *medicine: discovery, diagnosis and defeat of disease*. Pharmacogenomics, 2014.  
20 **15**(14): p. 1771-1790.
- 21 2. Ku, C.S., et al., *Integrating next-generation sequencing into the diagnostic testing*  
22 *of inherited cancer predisposition*. Clin Genet, 2013. **83**(1): p. 2-6.
- 23 3. Pfeifer, S.P., *From next-generation resequencing reads to a high-quality variant*  
24 *data set*. Heredity (Edinb), 2017. **118**(2): p. 111-124.
- 25 4. Li, H., *Toward better understanding of artifacts in variant calling from high-*  
26 *coverage samples*. Bioinformatics, 2014. **30**(20): p. 2843-51.
- 27 5. Li, H., *Exploring single-sample SNP and INDEL calling with whole-genome de*  
28 *novo assembly*. Bioinformatics, 2012. **28**(14): p. 1838-44.
- 29 6. Gupta, S.e.a. *SPARK: A high-level synthesis framework for applying parallelizing*  
30 *compiler transformations*. in *VLSI Design*. 2003. 16th International Conference on  
31 IEEE.

- 1 7. Parikh, H., et al., *svclassify: a method to establish benchmark structural variant*  
2 *calls*. BMC Genomics, 2016. **17**: p. 64.
- 3 8. Wong, K.H.Y., M. Levy-Sakin, and P.Y. Kwok, *De novo human genome*  
4 *assemblies reveal spectrum of alternative haplotypes in diverse populations*. Nat  
5 Commun, 2018. **9**(1): p. 3040.
- 6 9. Kehr, B., et al., *Diversity in non-repetitive human sequences not found in the*  
7 *reference genome*. Nat Genet, 2017. **49**(4): p. 588-593.
- 8 10. Hatem, A., et al., *Benchmarking short sequence mapping tools*. BMC  
9 Bioinformatics, 2013. **14**: p. 184.
- 10 11. *GATK Best Practice*. Available from: [https://software.broadinstitute.org/gatk/best-](https://software.broadinstitute.org/gatk/best-practices/)  
11 [practices/](https://software.broadinstitute.org/gatk/best-practices/).
- 12 12. Li, H., *Minimap2: pairwise alignment for nucleotide sequences*. Bioinformatics,  
13 2018. **34**(18): p. 3094-3100.
- 14 13. Cameron, D.L., L. Di Stefano, and A.T. Papenfuss, *Comprehensive evaluation and*  
15 *characterisation of short read general-purpose structural variant calling software*.  
16 Nat Commun, 2019. **10**(1): p. 3240.
- 17 14. *Nanopore*. Available from: <https://nanoporetech.com/>.
- 18 15. *PacBio*. Available from: <https://www.pacb.com/>.
- 19 16. Shi, L., et al., *Long-read sequencing and de novo assembly of a Chinese genome*.  
20 Nat Commun, 2016. **7**: p. 12065.
- 21 17. Merker, J.D., et al., *Long-read genome sequencing identifies causal structural*  
22 *variation in a Mendelian disease*. Genet Med, 2018. **20**(1): p. 159-163.
- 23 18. Sudmant, P.H., et al., *An integrated map of structural variation in 2,504 human*  
24 *genomes*. Nature, 2015. **526**(7571): p. 75-81.
- 25 19. Molnar, J., et al., *The genome of the chicken DT40 bursal lymphoma cell line*. G3  
26 (Bethesda), 2014. **4**(11): p. 2231-40.
- 27 20. Deininger, P., *Alu elements: know the SINEs*. Genome Biol, 2011. **12**(12): p. 236.
- 28 21. *pbsv*. Available from: <https://github.com/pacificbiosciences/pbsv/>.
- 29 22. Li, H., *FermiKit: assembly-based variant calling for Illumina resequencing data*.  
30 Bioinformatics, 2015. **31**(22): p. 3694-6.
- 31 23. *UCSC LiftOver*. Available from: <https://genome.ucsc.edu/cgi-bin/hgLiftOver>.
- 32 24. Massie, M.a.N., Frank and Hartl, Christopher and Kozanitis, Christos and  
33 Schumacher, Andre and Joseph, Anthony D and Patterson, David A, *ADAM:*  
34 *Genomics Formats and Processing Patterns for Cloud Scale Computing*, in

- 1            *UCB/EECS-2013-207*. 2013: EECS Department, University of California,  
2            Berkeley.
- 3    25.    Chung-Tsai Su, M.-T.C., Yun-Chian Cheng, Yun-Lung Li, Yao-Ting Wang,  
4            *GraphSeq: Accelerating String Graph Construction for De Novo Assembly on*  
5            *Spark*. 2016.
- 6    26.    Simpson, J.T. and R. Durbin, *Efficient de novo assembly of large genomes using*  
7            *compressed data structures*. *Genome Res*, 2012. **22**(3): p. 549-56.
- 8    27.    Bonizzoni, P., et al., *FSG: Fast String Graph Construction for De Novo Assembly*.  
9            *J Comput Biol*, 2017. **24**(10): p. 953-968.
- 10   28.    *GraphFrame*. Available from: <https://github.com/graphframes/graphframes>.
- 11

## 12    **Acknowledgements**

13    We are grateful to Prof. Chen Chia-Hsiang and his team for supporting the  
14    Sanger sequencing validation. In addition, Cheng Yun-Chian and Prof. Chen  
15    Chien-Yu assisted in algorithm design in the early stage. The results presented  
16    in the paper are based on the data generated by the Atgenomix Seqslab Cloud  
17    platform.

## 18    **Funding**

19    The research was supported by Atgenomix Inc.

## 20    **Author information**

### 21    **Affiliations**

22    Atgenomix Inc., Taiwan, R.O.C.

23    Chung-Tsai Su, Sid Weng, Yun-Lung Li & Ming-Tai Chang

### 24    **Contributions**

25    CS, SW, YL and MC developed the algorithms and implemented the tools for  
26    data transformation and error correction. CS developed the algorithms and  
27    implemented the tools for string graph construction. CS and SW developed the  
28    algorithms and implemented the tools for haplotype-sensitive assembly. CS

1 collected the sequencing data and carried out the benchmarks based on the  
2 sequencing dataset. CS carried out the experiments, developed the structural  
3 variant caller and carried out the related experiments. CS prepared the  
4 manuscript with input from all other authors. All authors read and approved  
5 the final manuscript.

## 6 Corresponding author

7 Correspondence to Chung-Tsai Su

## 8 Ethics declarations

### 9 Ethics approval and consent to participate

10 Not applicable.

### 11 Consent for publication

12 Not applicable.

### 13 Competing interests

14 CS, SW, YL and MC are employees of Atgenomix Inc. In addition, they all hold  
15 shares, stock options or restricted stock units in Atgenomix Inc.

## 16 Additional information

17 **Additional file 1:** The detailed information for each table and figure. (XLSX)

18 **Additional file 2:** The FASTA file for insertions. (TEXT)

19 **Additional file 3:** The FASTA file for soft-clipped sequences. (TEXT)

20 **Additional file 4:** The FASTA file for unmapped contigs. (TEXT)

21 **Additional file 5:** Sanger Validation for N-Gap cases. (DOCX)

22 **Additional file 6:** Review history. (DOCX)
